# Supplementary material
Source: publisher figshare collection journal article supplement (https://gsajournals.figshare.com/articles/dataset/_/10312070)
Supplement: Supplementary file [file 2]

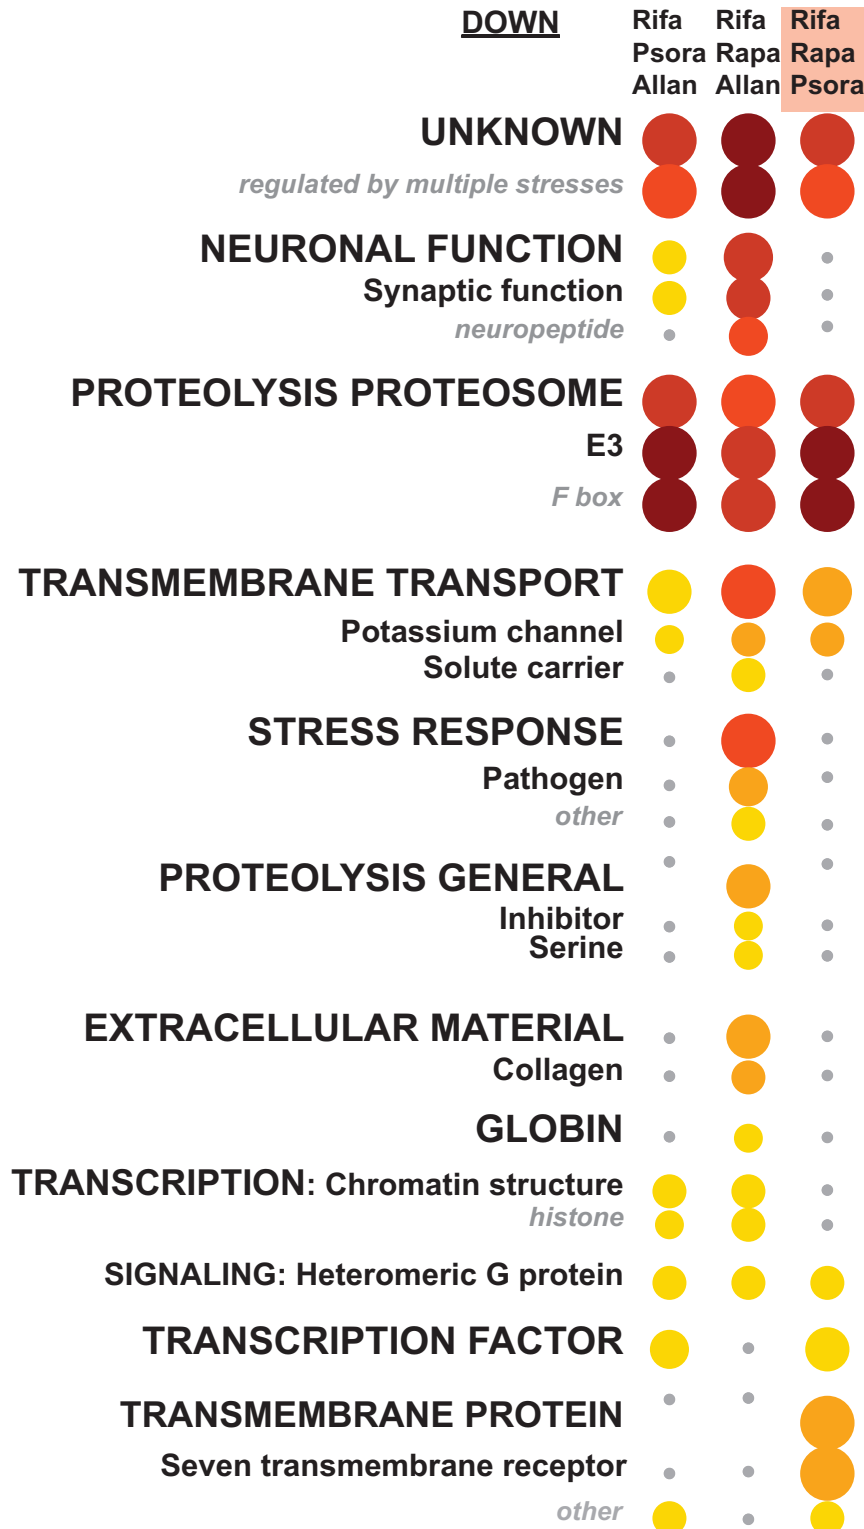

**Figure S10: WormCat analysis of downregulated genes in *C. elegans* treated with triple combinations of lifespan-changing drugs.** Category 1, 2, and 3 analysis of downregulated genes found by RNA-seq from triple-drug combinations (Admasu *et al.* 2018). Pink box denotes drug combination that causes premature death. Allan, Allantoin; Psora, Psora-4; Rapa, Rapamycin; Rifa, Rifampicin.
