# Supplementary material
Source: publisher figshare collection journal article supplement (https://gsajournals.figshare.com/articles/dataset/_/10312070)
Supplement: Supplementary file [file 2]

A.

### Germline Neutral (GN)

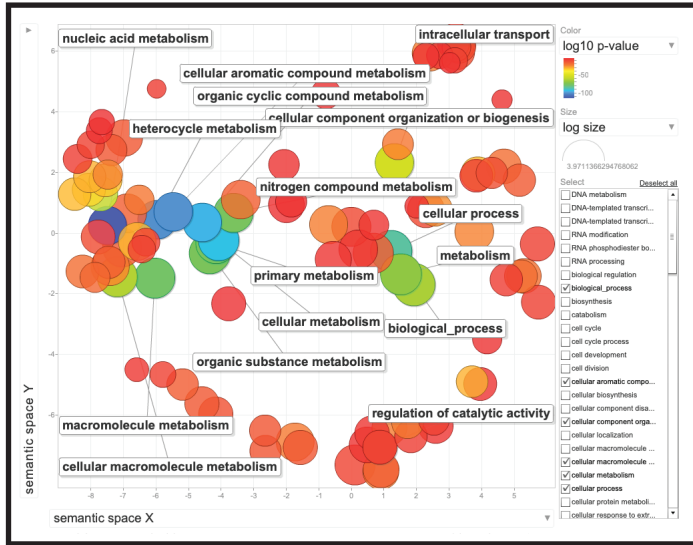

B.

### Oogenic (Oo)

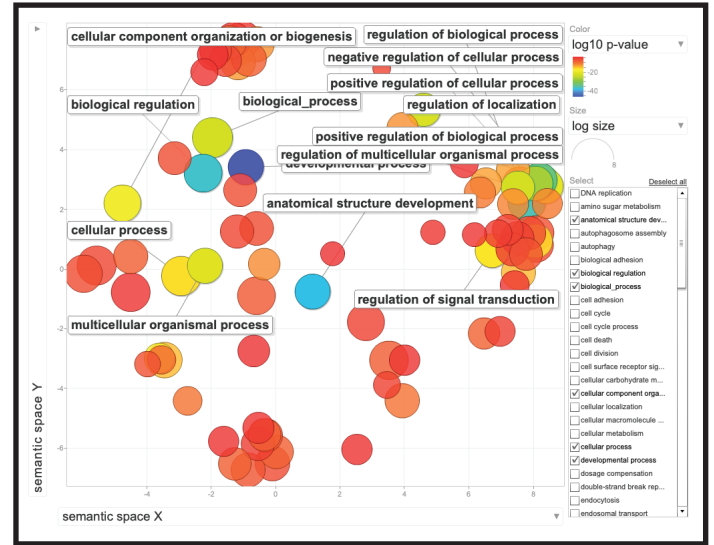

C.

### Spermatogenic (Sp)

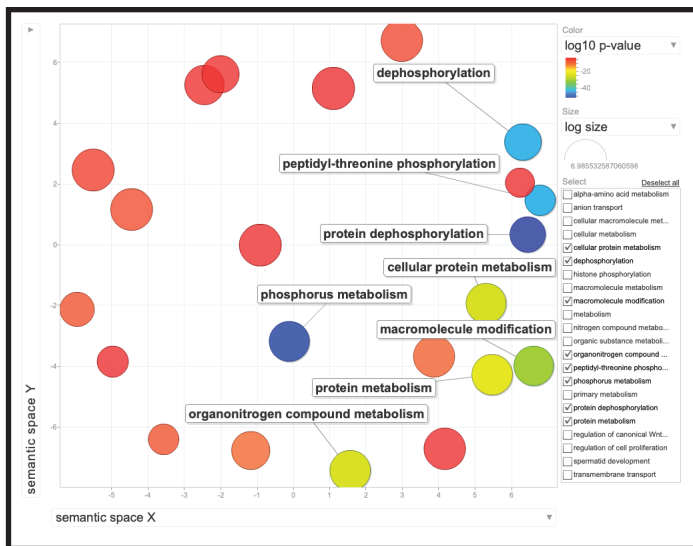

**Figure S4: GO analysis visualized by Revigo of germline RNA seq data from Ortiz, et al.** Sematic graphs of GO analysis generated by GOrilla (Eden *et al.* 2009) and visualized by Revigo (Supek *et al.* 2011) of Gender Neutral (A), Oogenic (B) and Spermatogenic (C) germlines (Ortiz *et al.* 2014).
