# Supplementary material
Source: publisher figshare collection journal article supplement (https://gsajournals.figshare.com/articles/dataset/_/10312070)
Supplement: Supplementary file [file 2]

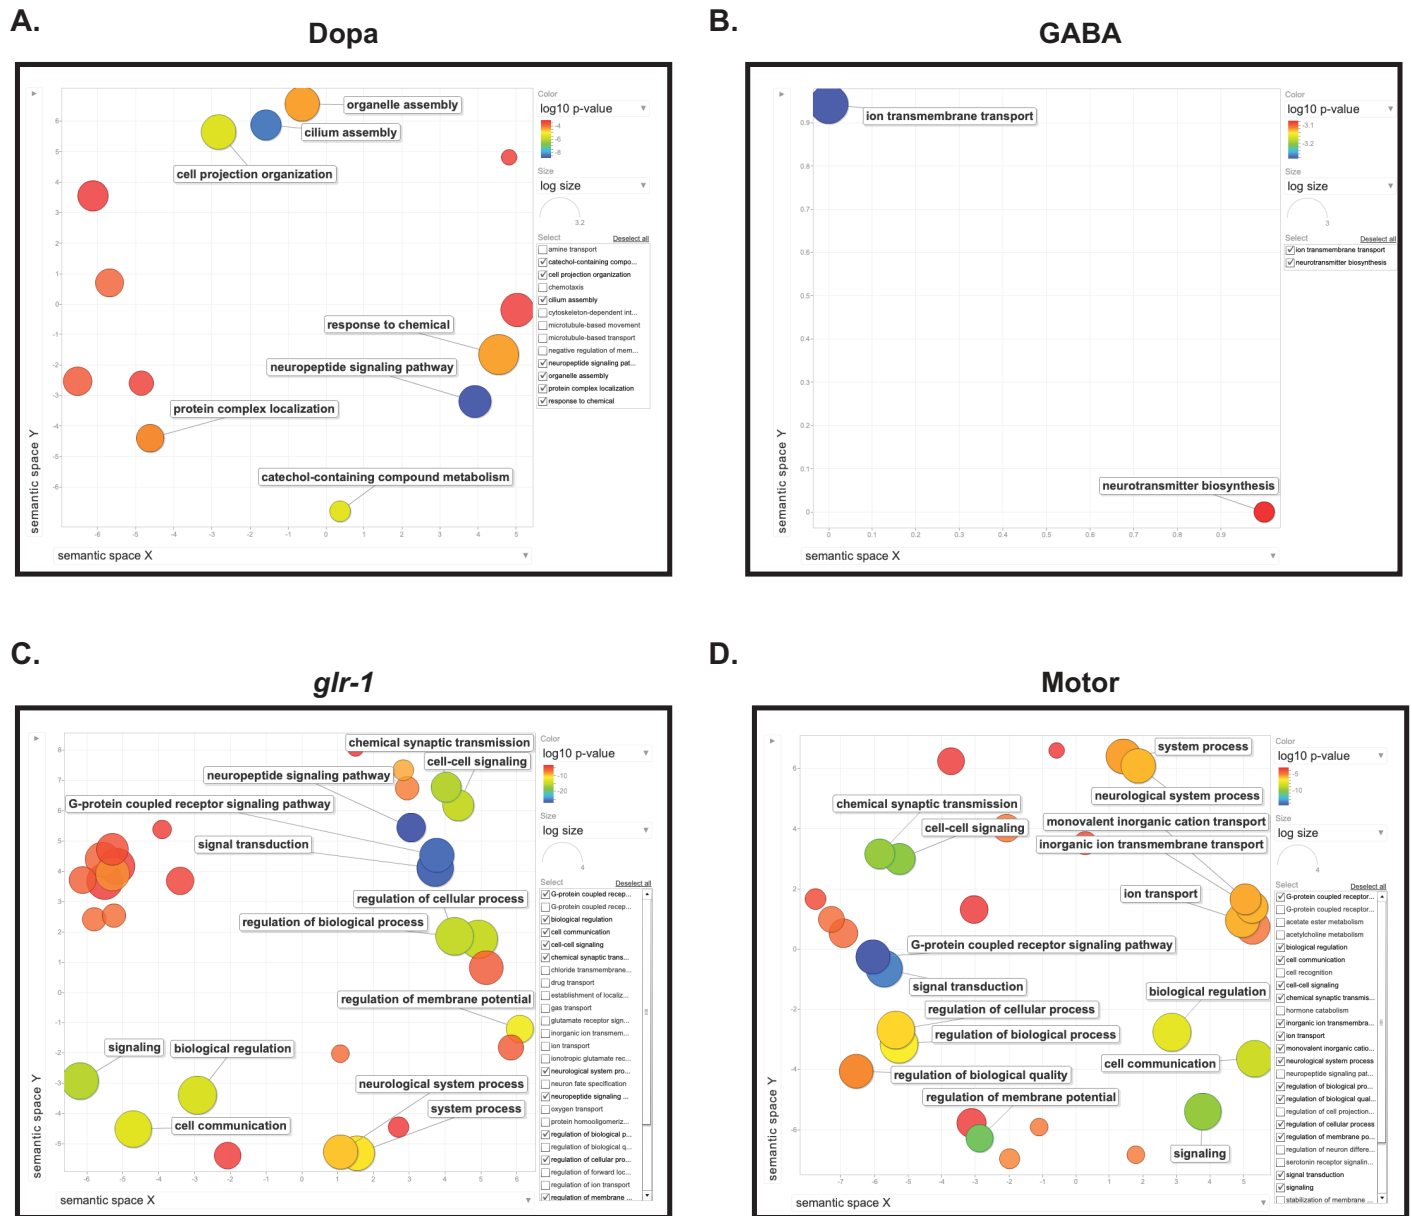

**Figure S8: GO analysis visualized by Revigo of larval neuronal subtype microarray data from Spencer, et al.** Sematic graphs of GO analysis generated by GOrilla (Eden *et al.* 2009) and visualized by Revigo (Supek *et al.* 2011) of microarray from larval dopamenergic (Dopa) (**A**) Gabaergic (GABA) (**B**), *glr-1* expressing (*glr-1*) (**C**), or Class A motor neurons (Motor) (**D**) (Spencer *et al.* 2011).
