# Supplementary material
Source: publisher figshare collection journal article supplement (https://gsajournals.figshare.com/articles/dataset/_/10312070)
Supplement: Supplementary file [file 2]

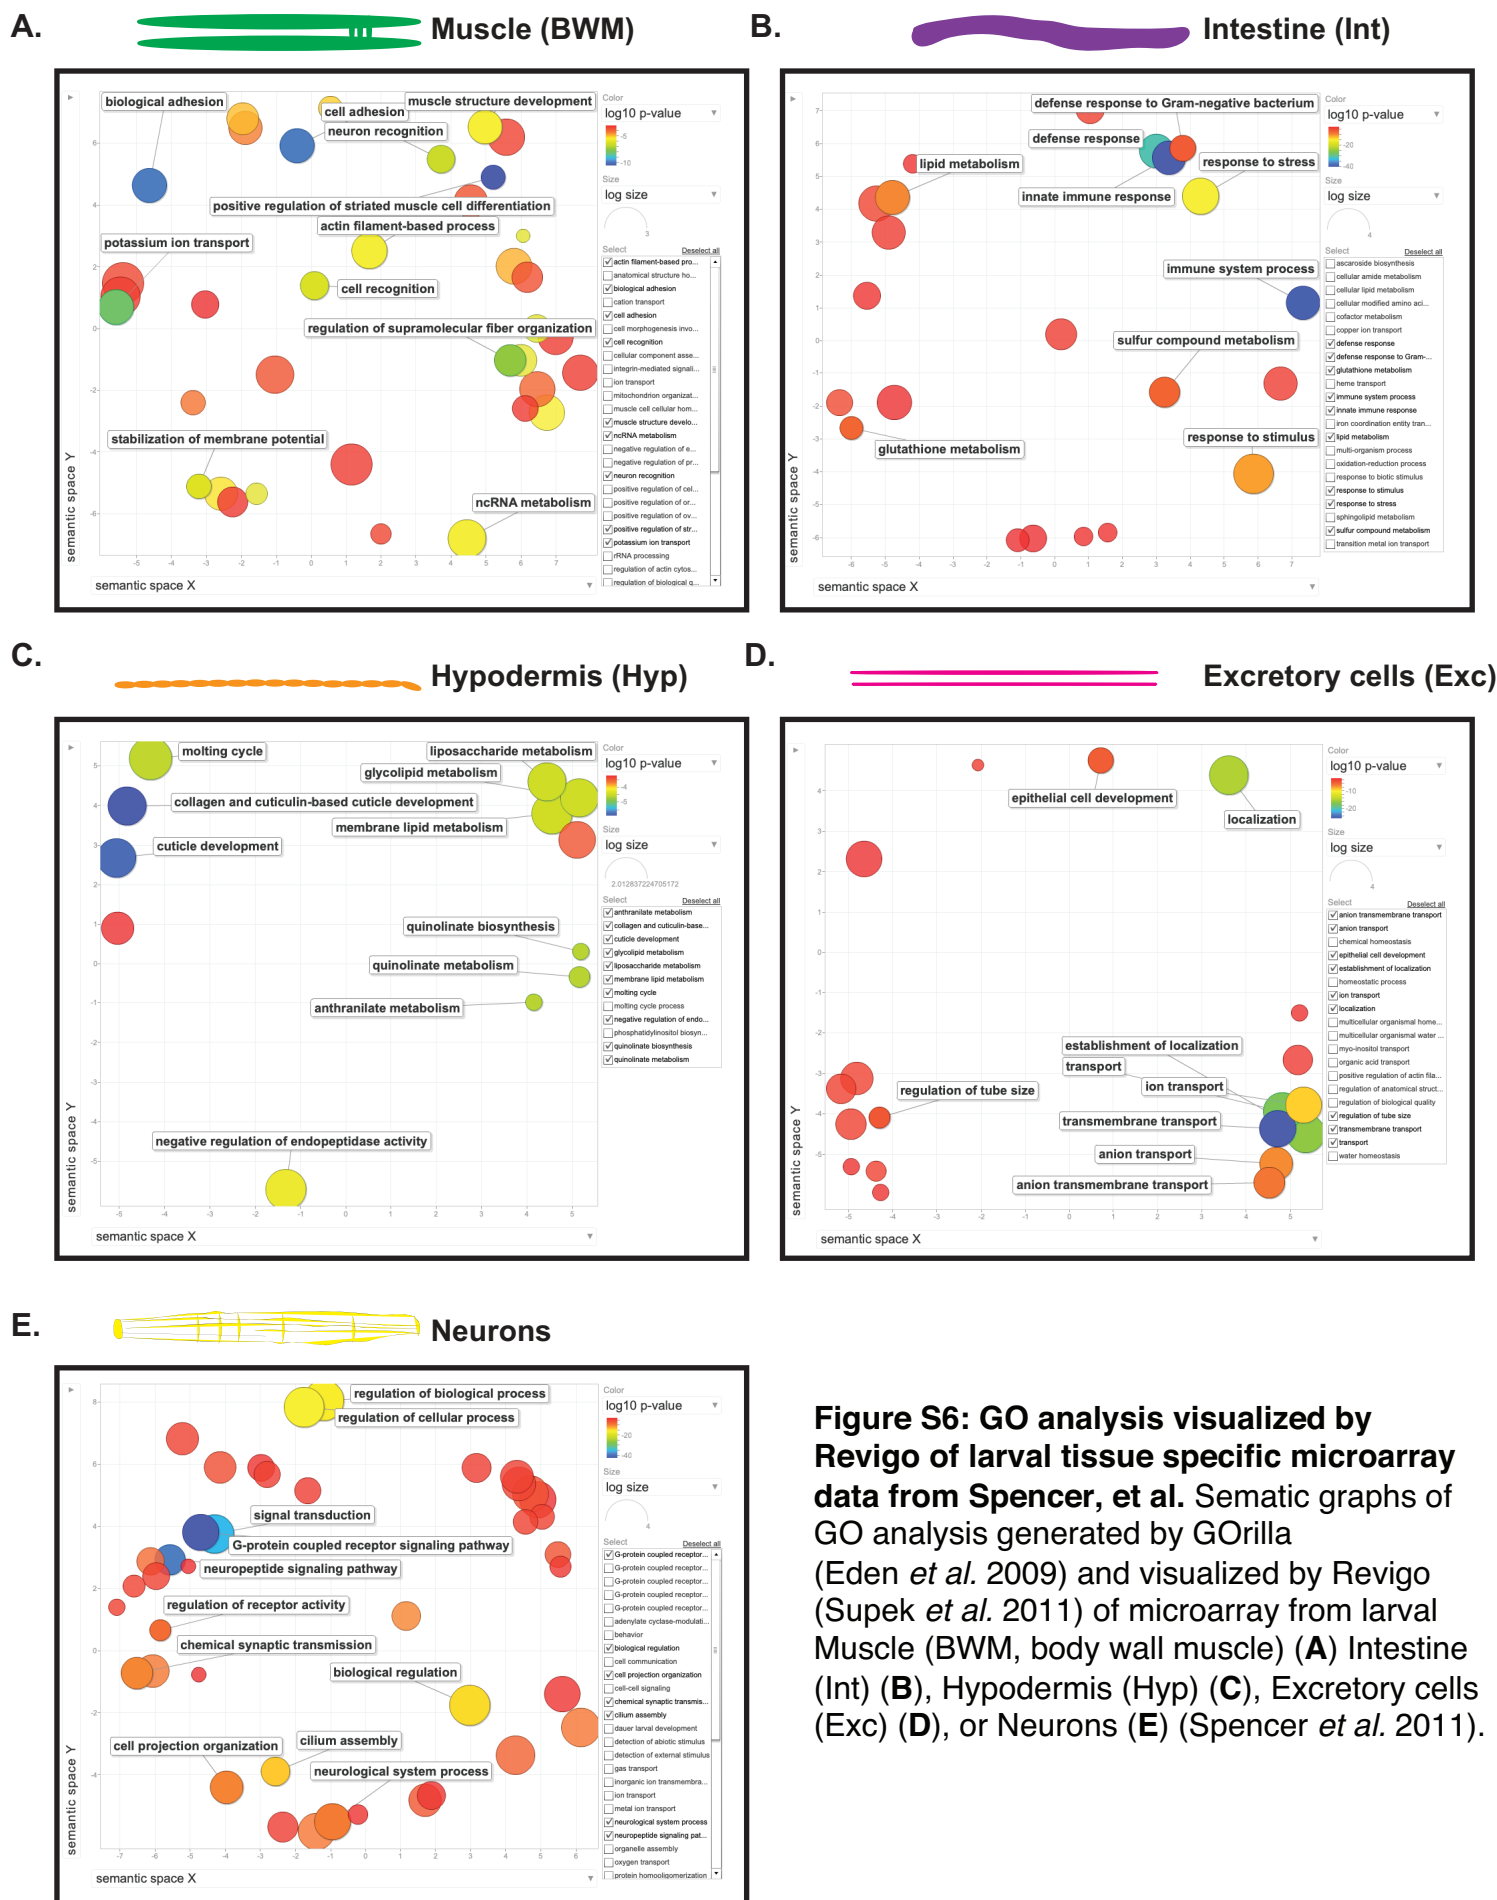

**Figure S6: GO analysis visualized by Revigo of larval tissue specific microarray data from Spencer, et al.** Semantic graphs of GO analysis generated by GOrilla (Eden *et al.* 2009) and visualized by Revigo (Supek *et al.* 2011) of microarray from larval Muscle (BWM, body wall muscle) (A) Intestine (Int) (B), Hypodermis (Hyp) (C), Excretory cells (Exc) (D), or Neurons (E) (Spencer *et al.* 2011).
