# Supplementary material
Source: publisher figshare collection journal article supplement (https://gsajournals.figshare.com/articles/dataset/_/10312070)
Supplement: Supplementary file [file 2]

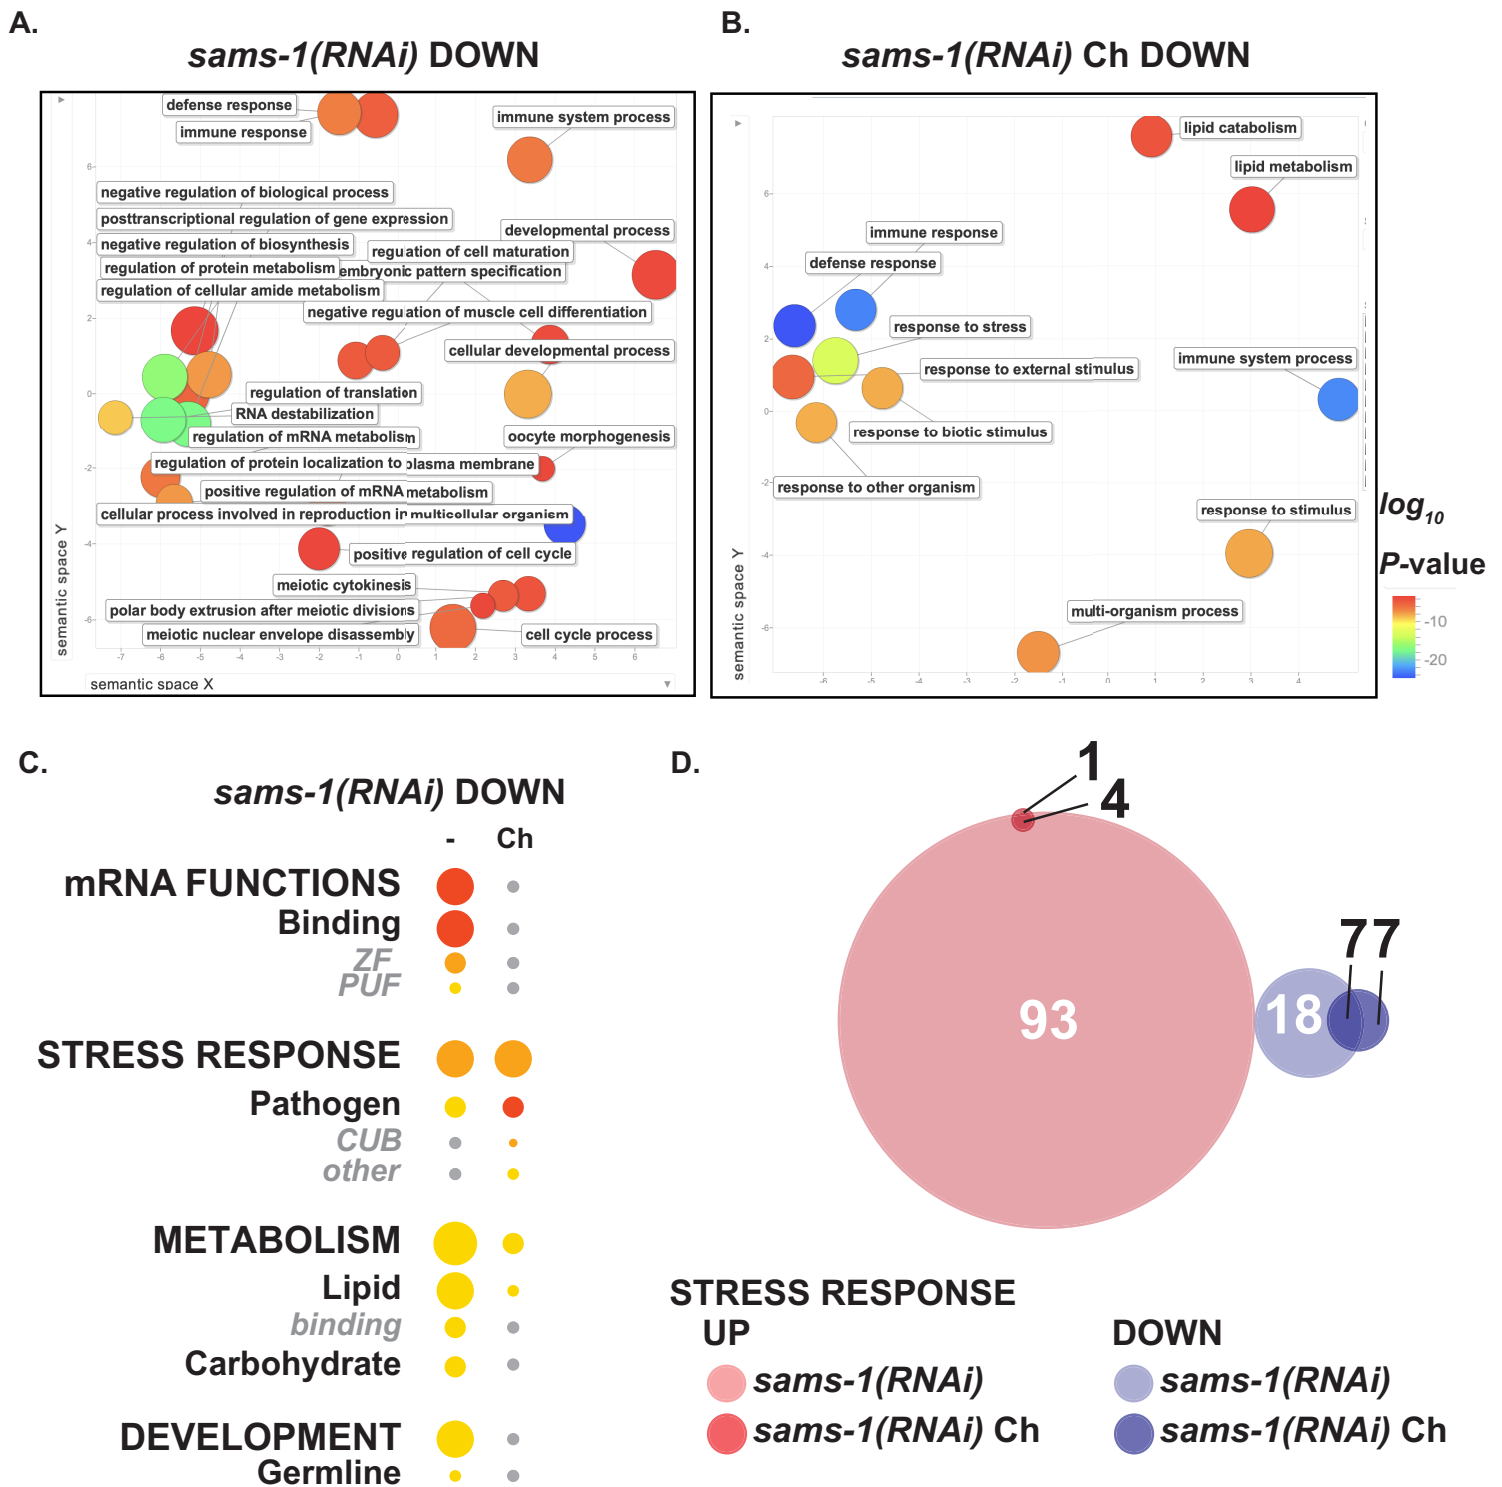

**Figure S2. WormCat verifies known category enrichments from *sams-1(RNAi)* downregulated genes.** (A-B) REGIVO semantic plots of *sams-1(RNAi)* downregulated genes from untreated (A) and choline (Ch) treated (B) animals. (C) WormCat bubble heat plots comparing *sams-1(RNAi)* with and without choline. Gene expression microarray data for A-C were obtained from Ding *et al.*, 2015. Bubble heat plot key is the same as Fig 1D. CUB, Complement C1r/C1s, Uegf, Bmp1 Domain; PUF, Pumilio and *fem-3* mRNA Binding Factor; ZF, Zinc Finger. (D) Venn diagrams showing overlap between *Stress Response* genes in *sams-1(RNAi)* up (pink) or downregulated genes (blue).
