# Supplementary material
Source: publisher figshare collection journal article supplement (https://gsajournals.figshare.com/articles/dataset/_/10312070)
Supplement: Supplementary file [file 2]

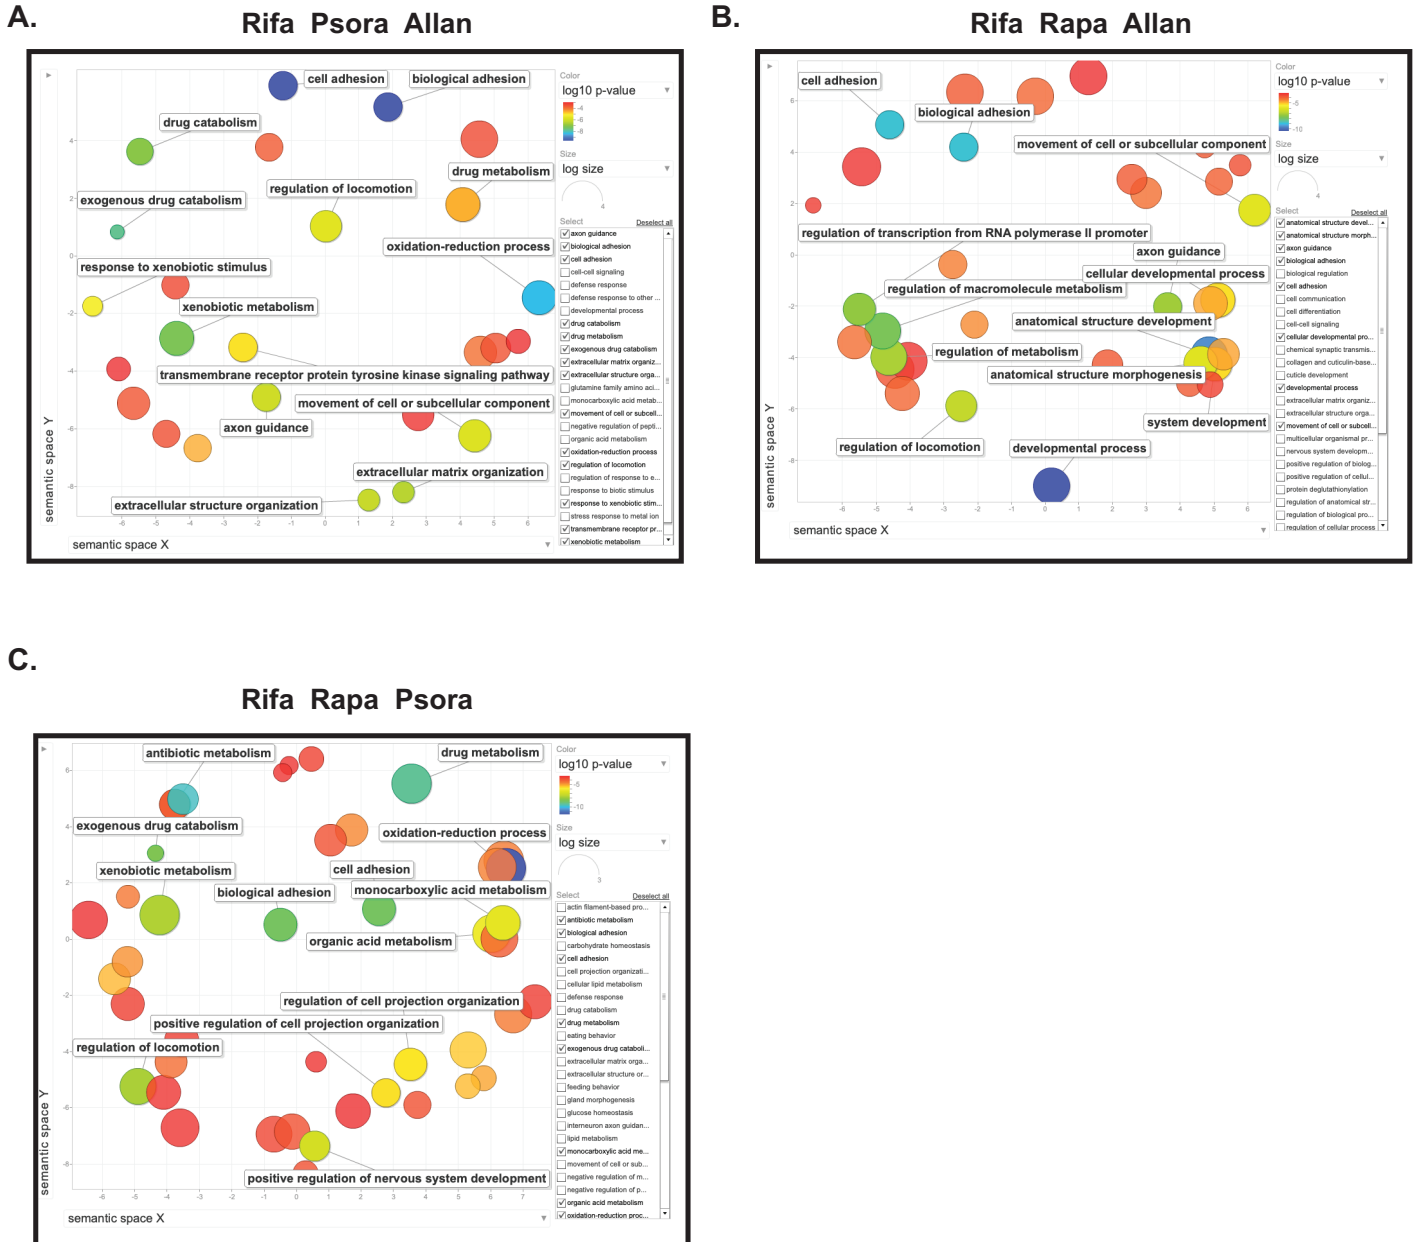

**Figure S11: GO analysis visualized by Revigo of RNA seq data from *C. elegans* treated with triple combinations of lifespan extending drugs from Admasu, et al.** Semantic graphs of GO analysis generated by GOrilla (Eden *et al.* 2009) and visualized by Revigo (Supek *et al.* 2011) of RNA seq data from Rifa, Psora and Allan treated (**A**) Ripa, Rapa, Allan treated (**B**), or Ripa, Rapa, Psora treated (**C**). (Admasu *et al.* 2018).
