# Supplementary material
Source: publisher figshare collection journal article supplement (https://gsajournals.figshare.com/articles/dataset/_/10312070)
Supplement: Supplementary file [file 2]

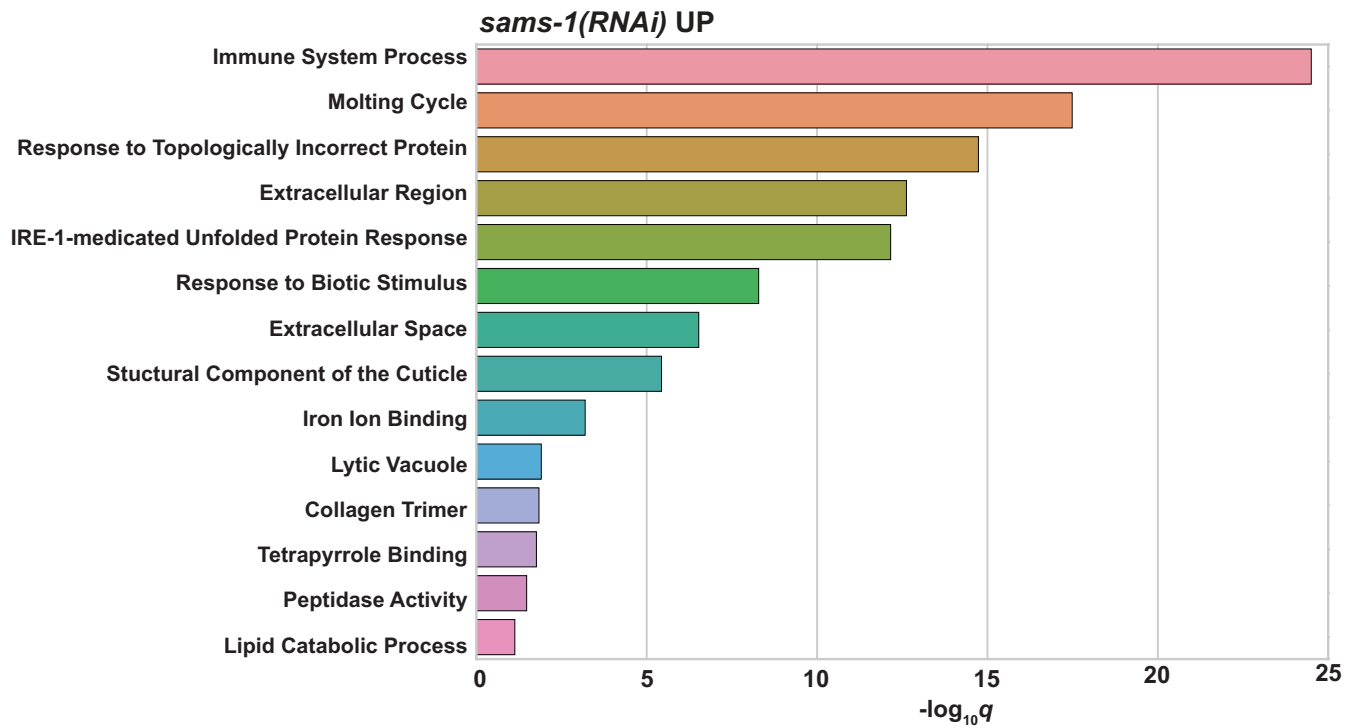

**Figure S1. GO Analysis of upregulated genes from *sams-1(RNAi)* animals by Gene Set Enrichment Analysis.** Bar graph showing GO categories returned from *sams-1(RNAi)* upregulated genes (Ding *et al.* 2015) by the WormBase Gene Set Enrichment Analysis tool (Angeles-Albores *et al.* 2016).
