# Supplementary material
Source: publisher figshare collection journal article supplement (https://gsajournals.figshare.com/articles/dataset/_/10312070)
Supplement: Supplementary file [file 2]

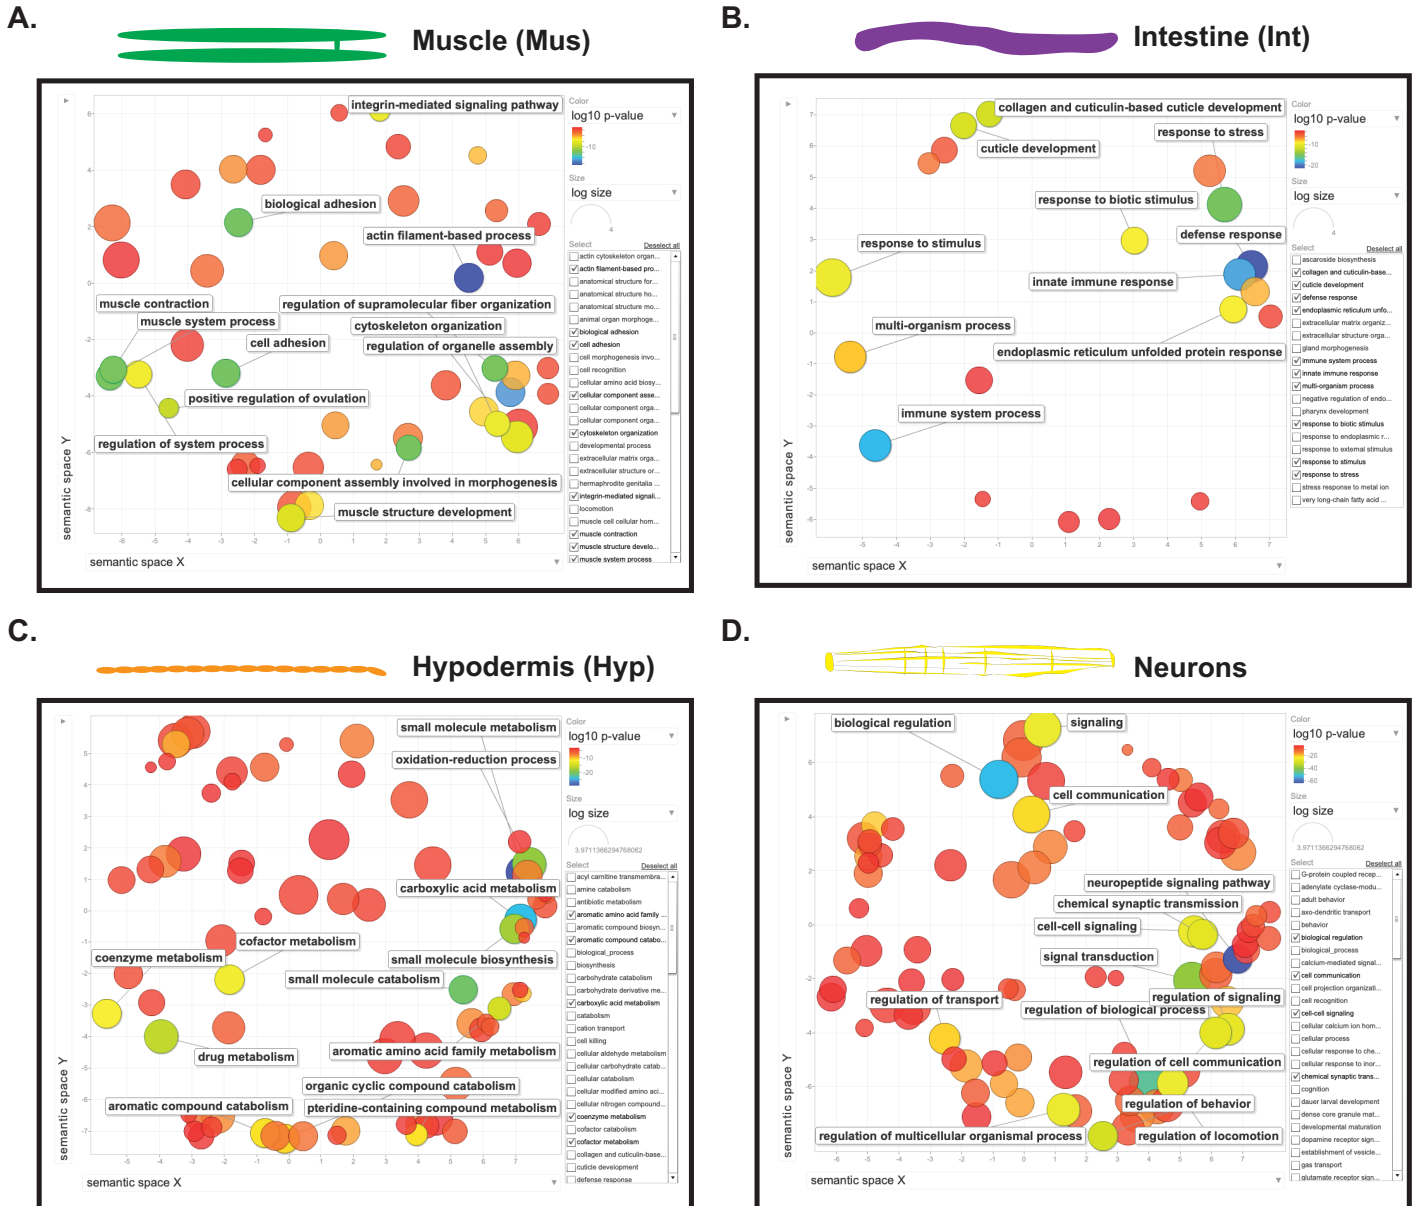

**Figure S7: GO analysis visualized by Revigo of adult tissue specific RNA seq data from Kaletsky, et al.** Sematic graphs of GO analysis generated by GOrilla (Eden *et al.* 2009) and visualized by Revigo (Supek *et al.* 2011) of RNA seq data from adult Muscle (Mus) (A) Intestine (Int) (B), Hypodermis (Hyp) (C), Neurons (D) (Kaletsky *et al.* 2018).
