# Supplementary material
Source: publisher figshare collection journal article supplement (https://gsajournals.figshare.com/articles/dataset/_/10312070)
Supplement: Supplementary file [file 2]

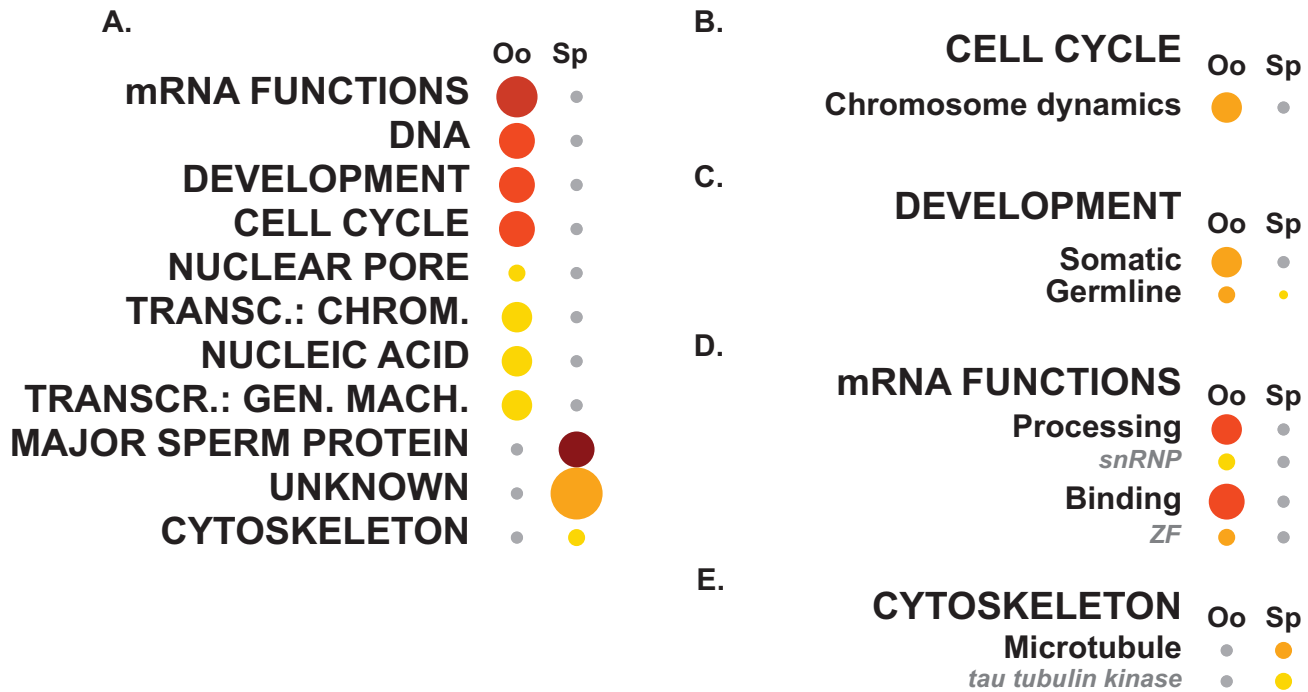

**Figure S3: WormCat analysis of germline-specific microarray data identifies the *tau tubulin kinase* family as a male-specific category.** (A) Category 1 analysis of Oogenic (Oo) or Spermatogenic (Sp) data sets ordered by most enriched in Oo data. Breakdown of data from the Category 1 level for Cell cycle (B), Development (C), mRNA Functions (D), or Cytoskeleton (E). All data is from Reinke et al. (Reinke et al., 2000). Gen. Trans. Machinery, General Transcription Machinery; Trans. Chromatin, Transcription: Chromatin; ZF, zinc finger.
