# Supplementary material
Source: publisher figshare collection journal article supplement (https://gsajournals.figshare.com/articles/dataset/_/10312070)
Supplement: Supplementary file [file 2]

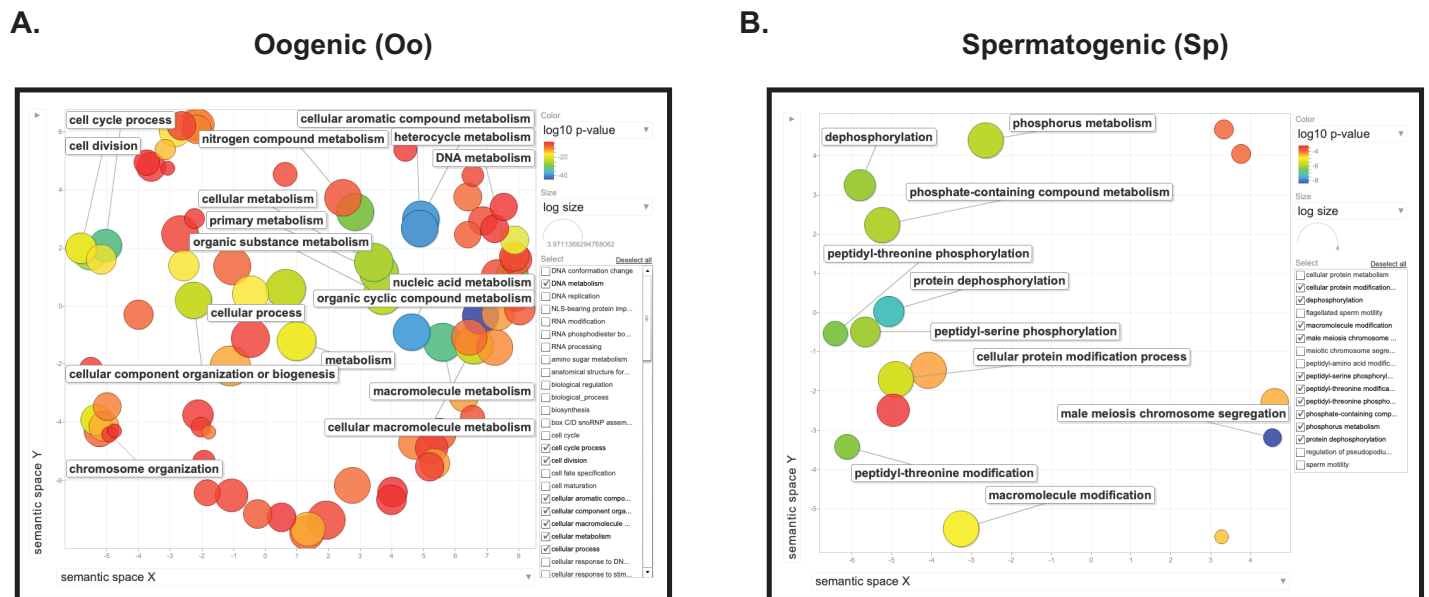

**Figure S5: GO analysis visualized by Revigo of germline microarray data from Reinke, et al.** Sematic graphs of GO analysis generated by GOrilla (Eden *et al.* 2009) and visualized by Revigo (Supek *et al.* 2011) of Oogenic (**A**) and Spermatogenic (**B**) germlines (Reinke *et al.* 2000).
