# Supplementary material
Source: publisher figshare collection journal article supplement (https://gsajournals.figshare.com/articles/dataset/_/10312070)
Supplement: Supplementary file [file 2]

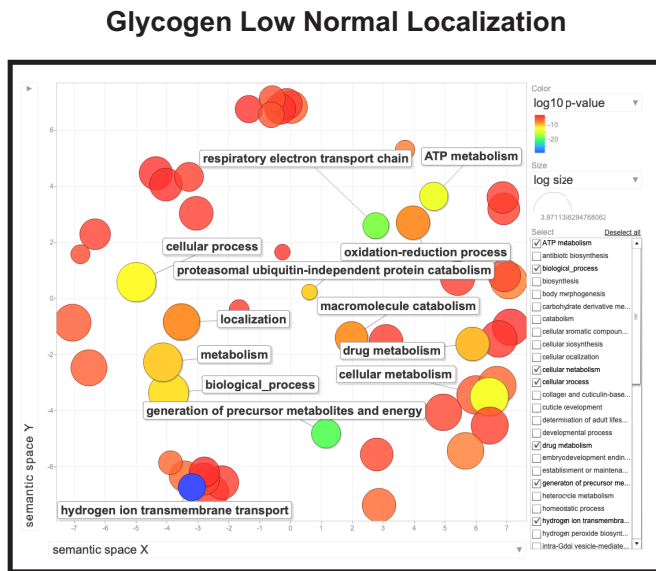

**Figure S12: GO analysis visualized by Revigo of RNA seq data from a *C. elegans* RNAi screen for glycogen storage from LaMacchia, et al.** Semantic graphs of GO analysis generated by GOrilla (Eden *et al.* 2009) and visualized by Revigo (Supek *et al.* 2011) of *C. elegans* showing low glycogen storage in an RNAi screen.
